# Supplementary material for: Risk Factors Associated with 30-Day Mortality in Older Patients with Influenza
Source: MDPI journal article supplement (doi:10.3390/jcm10163521), 2021-08-11
Supplement: s1 [file s1]

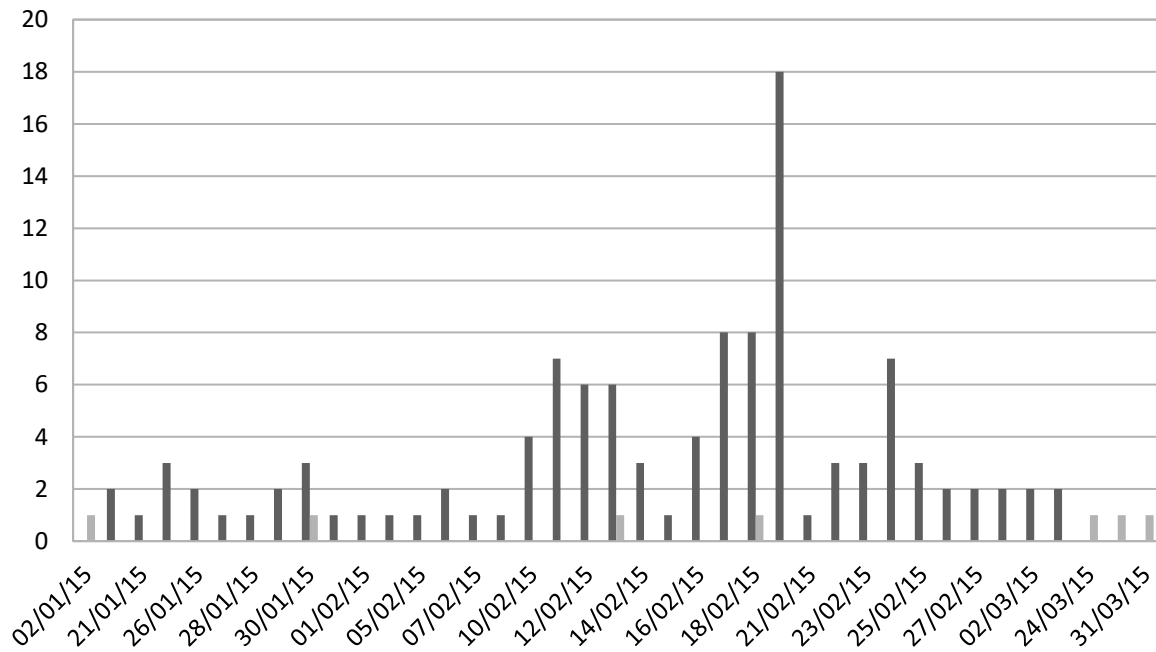

**Supplementary Figure S1.** Distribution over time of the number of positive influenza RT-PCR, (n=122). In black: positive RT-PCR for detection of influenza A. In grey: positive RT-PCR for detection of influenza B.

**Supplementary Table S1.** Screening, non-inclusion and enrollment process of participants according to the site of inclusion (Clinical Gerontology Department).

| Unit                         | Patients Screened<br>N=122 | Patients Non-Included<br>N = 8 | Patients Included<br>N=114 |
|------------------------------|----------------------------|--------------------------------|----------------------------|
| Acute-care unit n°1          | 42                         | 4                              | 38                         |
| Acute-care unit n°2          | 26                         |                                | 26                         |
| Post-acute care services n°1 | 7                          | 1                              | 6                          |
| Post-acute care services n°2 | 3                          |                                | 3                          |
| Long term care facilities    | 16                         | 2                              | 14                         |
| Nursing home residence n°1   | 10                         |                                | 10                         |
| Nursing home residence n°2   | 18                         | 1                              | 17                         |
